# Supplementary material for: Feasibility and Efficacy of Video-Assisted Thoracoscopic Surgery for the Surgical Stabilization of Rib Fractures: A Single-center Retrospective Cohort Study
Source: Research Square preprint supplement (doi:10.21203/rs.3.rs-6573428/v1), 2025-05-09
Supplement: Supplementary file 1 [file 2a038fa1ff613fc22a9fc8b5.docx]

Table 2: Comparison of baseline characteristics and perioperative outcomes between the with-VATS and without-VATS groups

|  | **With VATS**  **n = 42** | **Without VATS**  **n = 10** | ***p*** |
| --- | --- | --- | --- |
| Age (years) | 70 [50-84] | 69 [50-77] | 0.862 |
| Sex (male) | 32 (76.2) | 7 (70) | 0.697 |
| Mechanism of injury  Blunt/Penetrating | 42 / 0 | 10 / 0 |  |
| Isolated thoracic injury  Multiple trauma | 19 (45.2)  23 (54.8) | 1 (10)  9 (90) | 0.04 |
| Chest AIS  ISS | 3 [3-4]  15 [9-25] | 4 [3-5]  24 [19-41] | 0.015  0.017 |
| Time from injury to SSRF (days) | 3 [2-6] | 2 [1-4] | 0.223 |
| Operation time (minutes) | 194 [150-223] | 145 [103-208] | 0.078 |
| Intraoperative bleeding (ml) | 230 [87-378] | 100 [0-214] | 0.094 |
| Post-operative complications  Bleeding  Revision surgery  Wound infection  Excess pleural fluid  Hemothorax  Pneumothorax  Empyema  Delirium  Pneumonia | 1 (2.3)  4 (9.5)  1 (2.3)  9 (21.4)  1 (2.3)  0 (0)  1 (2.3)  13 (30.9)  8 (19.0) | 0 (0)  0 (0)  0 (0)  1 (10)  2 (20)  2 (20)  0 (0)  2 (20)  2 (20) | 0.808  0.413  0.808  0.375  0.091  0.625  0.808  0.396  0.625 |
| Tracheostomy | 3 (7.1) | 4 (40) | 0.02 |
| In-hospital Mortality | 0 (0) | 0 (0) |  |
| Post-operative length of ventilator days  Post-operative length of ICU stay (days)  Post-operative length of hospital stay (days)  Length of hospital stay (days) | 1 [1-3]  2 [2-4]  18 [9-29]  21 [11-39] | 4 [18-46]  6 [2-12]  41 [18-46]  42.5 [22-56] | 0.162  0.099  0.106  0.170 |
| Discharge destination  Home  Other hospital | 17 (40.5)  25 (59.5) | 1 (10)  9 (90) | 0.068 |

Continuous data are shown as median [range]. Categorical data are shown as n (%).

VATS, video-assisted thoracoscopic surgery; AIS, Abbreviated Injury Scale; ISS, Injury Severity Score; SSRF, surgical stabilization of rib fractures; ICU, intensive care unit
