# Supplementary material for: Feasibility and Efficacy of Video-Assisted Thoracoscopic Surgery for the Surgical Stabilization of Rib Fractures: A Single-center Retrospective Cohort Study
Source: Research Square preprint supplement (doi:10.21203/rs.3.rs-6573428/v1), 2025-05-09
Supplement: Supplementary file 2 [file 3ea5ce6dc0020dc3c47ef7f2.docx]

Table 1: Baseline characteristics and perioperative outcomes in all patients

|  | **n = 52** |
| --- | --- |
| Age (years) | 70 [50-82] |
| Sex (male) | 39 (75) |
| Mechanism of injury  Blunt/Penetrating | 52 / 0 |
| Isolated thoracic injury  Multiple trauma | 20 (38.5)  32 (61.5) |
| Chest AIS  ISS | 3 [3-4]  17 [9-28] |
| Time from injury to SSRF (days) | 3 [2-5.3] |
| Operation time (minutes) | 190 [143-222] |
| Intraoperative bleeding (ml) | 200 [73-357] |
| Post-operative complications  Bleeding  Revision surgery  Wound infection  Excess pleural fluid  Hemothorax  Pneumothorax  Empyema  Delirium  Pneumonia | 1 (1.9)  4 (7.7)  1 (1.9)  10 (19.2)  3 (5.8)  1 (1.9)  1 (1.9)  15 (28.8)  10 (19.2) |
| Tracheostomy | 7 (13.5) |
| In-hospital Mortality | 0 (0) |
| Post-operative length of ventilator days  Post-operative length of ICU stay (days)  Post-operative length of hospital stay (days)  Length of hospital stay (days) | 1 [1-4]  3 [2-6]  20 [9-33]  23 [11-41] |
| Discharge destination  Home  Other hospital | 18 (34.6)  34 (65.4) |

Continuous data are shown as median [range]. Categorical data are shown as n (%).

AIS, Abbreviated Injury Scale; ISS, Injury Severity Score; SSRF, surgical stabilization of rib fractures; ICU, intensive care unit
