# Supplementary material for: Feasibility and Efficacy of Video-Assisted Thoracoscopic Surgery for the Surgical Stabilization of Rib Fractures: A Single-center Retrospective Cohort Study
Source: Research Square preprint supplement (doi:10.21203/rs.3.rs-6573428/v1), 2025-05-09
Supplement: Supplementary file 3 [file d81fa1c39bd0d40c016c0076.docx]

Table 2: Intraoperative findings, missed injuries, and additional VATS procedures

| Intraoperative findings and missed injury | n (%) | Additional procedure |
| --- | --- | --- |
| Intrathoracic hematoma | 41 (97) | Evacuation of intrathoracic hemorrhage |
| Sharp bone fragments entering the thoracic cavity  Lung entrapment at the fracture site | 8 (16) | Release of entrapped lung |
| Lung injury | 7 (12) | Pulmorrhaphy |
| Diaphragm injury  　Transmural laceration  　Non-transluminal laceration | 4 (8)  1 (2)  3 (7) | Diaphragm repair with direct suture |

VATS, video-assisted thoracoscopic surgery
